# Supplementary material for: Malignant ascites: a source of therapeutic protein against ovarian cancer?
Source: PubMed Central journal article supplement (PMC6800269; doi:10.18632/oncotarget.27185), 2019-10-15
Supplement: oncotarget-10-5894-s001.pdf [file oncotarget-10-5894-s001.pdf]

## Malignant ascites: a source of therapeutic protein against ovarian cancer?

### SUPPLEMENTARY MATERIALS

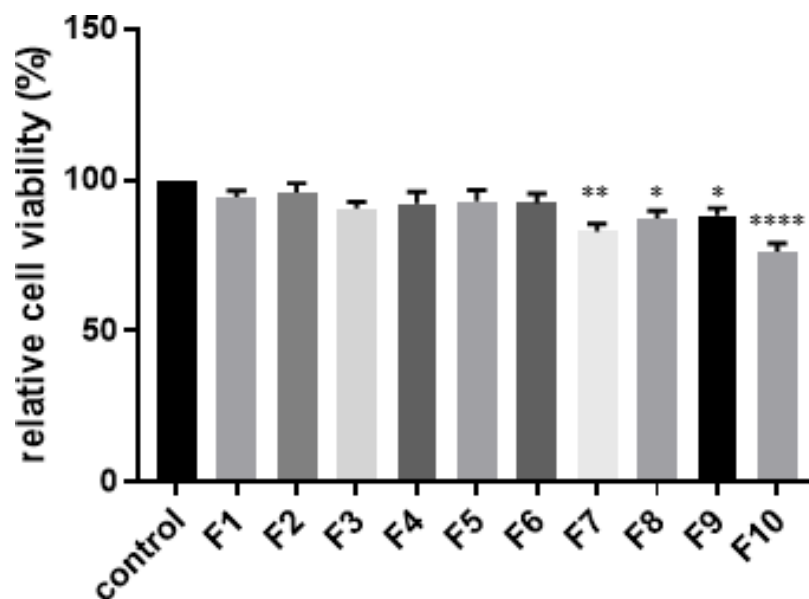

**Supplementary Figure 1: Evaluation of ascites' fractions (F1 to F10) on SKOV3 cell viability.** F1 to F6: inactive fractions; F7 to F10: active fractions compared to FBS (= control). \* $p < 0.05$ , \*\* $p < 0.005$ , \*\*\*\* $p < 0.00001$  (one way ANOVA test).

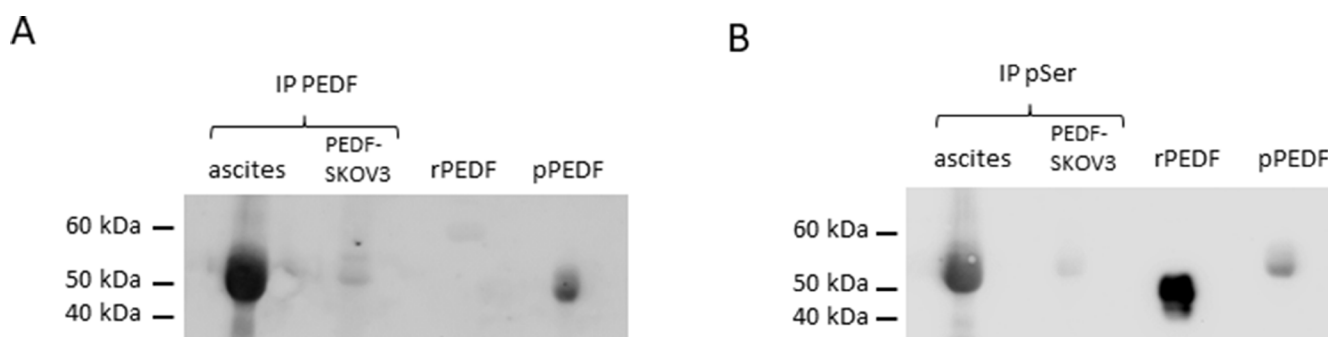

**Supplementary Figure 2: Phosphorylation of serine residue of PEDF.** Ascites or PEDF-SKOV3 total proteins were immunoprecipitated with either anti-PEDF antibodies (A) or anti-Phosphoserine antibodies (B). Immunoprecipitation products, rPEDF and pPEDF were immunoblotted with either anti-Phosphoserine antibodies (A) or anti-PEDF antibodies (B).

**Supplementary Table 1: Proteins identification in ascites (A100), inactive fraction (F2) and active fraction (F10) In grey: proteins found in all samples; in dark grey: proteins found in ascites and F10. See Supplementary Table 1**
